# Supplementary material
Source: PubMed Central journal article supplement (PMC7868361)
Supplement: 41431_2020_717_MOESM1_ESM.pdf [file 41431_2020_717_MOESM1_ESM.pdf]

## **Supplementary Material**

**1. Supplementary Movie Legends**

**2. Supplementary Tables**

**3. Consortium**

## **Supplementary Movie legends**

**Video S1.** In the context of severe spastic tetraplegia with generalized hypotonia, patient 7 presents clonic jerks of upper and lower limbs exacerbated by tactile and visual stimulation, associated with eye blinking and roving eye movements. Diffuse muscle wasting and intention tremor can also be observed.

**Video S2.** Patient 9 displays spastic tetraplegia with evident muscle wasting. He has both horizontal and rotatory nystagmus. Despite the profound psychomotor delay, social smiling after tactile stimulation is present.

**Video S3.** Patient 11 suffers from severe generalized hypotonia with complete lack of head control. He has poor response to visual stimulation and bilateral constant divergent strabismus.



**Abbreviations.** Abs= Absent; AS = atonic seizures; AUS = Australia; BS = brainstem; Cat= Cataract; CB = cerebellar; CCH = corpus callosum hypoplasia; CK, creatine kinase; CVI = cortical visual impairment; EEG = electroencephalogram; F = female; FS = focal seizures; GM = grand mal; GS = gelastic seizures; HTN = hypertension; ID = intellectual disability; Imp= Impaired; IND= Indian; Inf = infection; IS = infantile spasms; M = male; MC = microcephaly; mo = months; MS= myoclonic seizures; N/A = not available; NN= none noted; NT= No tracking; Ny = nystagmus; OA = optic atrophy; Oligo= Oligohydramnios; Prof = profound; PRT= Portugal; Pt = patient; Reg= regular; SDS = standard deviations; TS = tonic seizures; TCS = tonic-clonic seizures; USA = United States of America; y = years. † Caucasian, Turkish, and French-Canadian. ‡ Including plasma lactate, creatine phosphokinase, and serum glutamic oxaloacetic transaminase (SGOT) and pyruvic transaminase (SGPT). Regression was defined as the clear loss of milestones during aging, and included motor, coordination and social milestones. The present cases are compared with the cases presented in Van Bergen et al. and Kaur et al. in the two right-most columns. Van Bergen presented 7 patients from 3 families. Numbers in parentheses represent the number of patients displaying the feature if available.

**Table S2.** TRAPP subunit subcomplex components and clinical syndrome so far associated with disease. Most TRAPP subunits are part of both TRAPP II and III complexes except for C10, which is exclusively part of TRAPP CII, and TRAPP C11, -12, and -13, which are exclusively part of TRAPP CIII. All conditions are autosomal recessive except the *TRAPP C2* gene which is X-linked.

| Subunit | Complex    | Clinical Condition                                                          | OMIM#  |
|---------|------------|-----------------------------------------------------------------------------|--------|
| C1      | II and III |                                                                             |        |
| C2      | II and III | Spondyloepiphyseal dysplasia tarda, X-linked                                | 313400 |
| C2L     | II and III | Encephalopathy, progressive, early-onset, with episodic rhabdomyolysis      | 618331 |
| C3      | II and III |                                                                             |        |
| C4      | II and III | Neurodevelopmental disorder with epilepsy, spasticity, and brain atrophy    | 618741 |
| C5      | II and III |                                                                             |        |
| C6A     | II and III |                                                                             |        |
| C6B     | II and III | Neurodevelopmental disorder with microcephaly, epilepsy, and brain atrophy  | 617862 |
| C9      | II and III | Mental retardation, autosomal recessive 13                                  | 613192 |
| C10     | II         |                                                                             |        |
| C11     | III        | Muscular dystrophy, limb-girdle, autosomal recessive 18                     | 615356 |
| C12     | III        | Encephalopathy, progressive, early-onset, with brain atrophy and spasticity | 617669 |
| C13     | III        |                                                                             |        |

## Members of the Undiagnosed Diseases Network Consortium

Maria T. Acosta, Margaret Adam, David R. Adams, Pankaj B. Agrawal, Mercedes E. Alejandro, Justin Alvey, Laura Amendola, Ashley Andrews, Euan A. Ashley, Mahshid S. Azamian, Carlos A. Bacino, Guney Bademci, Eva Baker, Ashok Balasubramanyam, Dustin Baldridge, Jim Bale, Michael Bamshad, Deborah Barbouth, Pinar Bayrak-Toydemir, Anita Beck, Alan H. Beggs, Edward Behrens, Gill Bejerano, Jimmy Bennet, Beverly Berg-Rood, Jonathan A. Bernstein, Gerard T. Berry, Anna Bican, Stephanie Bivona, Elizabeth Blue, John Bohnsack, Carsten Bonnenmann, Devon Bonner, Lorenzo Botto, Brenna Boyd, Lauren C. Briere, Elly Brokamp, Gabrielle Brown, Elizabeth A. Burke, Lindsay C. Burrage, Manish J. Butte, Peter Byers, William E. Byrd, John Carey, Olveen Carrasquillo, Ta Chen Peter Chang, Sirisak Chanprasert, Hsiao-Tuan Chao, Gary D. Clark, Terra R. Coakley, Laurel A. Cobban, Joy D. Cogan, Matthew Coggins, F. Sessions Cole, Heather A. Colley, Cynthia M. Cooper, Heidi Cope, William J. Craigen, Andrew B. Crouse, Michael Cunningham, Precilla D'Souza, Hongzheng Dai, Surendra Dasari, Mariska Davids, Jyoti G. Dayal, Matthew Deardorff, Esteban C. Dell'Angelica, Shweta U. Dhar, Katrina Dipple, Daniel Doherty, Naghmeh Dorrani, Emilie D. Douine, David D. Draper, Laura Duncan, Dawn Earl, David J. Eckstein, Lisa T. Emrick, Christine M. Eng, Cecilia Esteves, Tyra Estwick, Marni Falk, Liliana Fernandez, Carlos Ferreira, Elizabeth L. Fieg, Laurie C. Findley, Paul G. Fisher, Brent L. Fogel, Irman Forghani, Laure Fresard, William A. Gahl, Ian Glass, Rena A. Godfrey, Katie Golden-Grant, Alica M. Goldman, David B. Goldstein, Alana Grajewski, Catherine A. Groden, Andrea L. Gropman, Irma Gutierrez, Sihoun Hahn, Rizwan Hamid, Neil A. Hanchard, Kelly Hassey, Nichole Hayes, Frances High, Anne Hing, Fuki M. Hisama, Ingrid A. Holm, Jason Hom, Martha Horike-Pyne, Alden Huang, Yong Huang, Rosario Isasi, Fariha Jamal, Gail P. Jarvik, Jeffrey Jarvik, Suman Jayadev, Jean M. Johnston, Lefkothea Karaviti, Emily G. Kelley, Jennifer Kennedy, Dana Kiley, Isaac S. Kohane, Jennefer N. Kohler, Deborah Krakow, Donna M. Krasnewich, Elijah Kravets, Susan Korrick, Mary Koziura, Joel B. Krier, Seema R. Lalani, Byron Lam, Christina Lam, Brendan C. Lanpher, Ian R. Lanza, C. Christopher Lau, Kimberly LeBlanc, Brendan H. Lee, Hane Lee, Roy Levitt, Richard A. Lewis, Sharyn A. Lincoln, Pengfei Liu, Xue Zhong Liu, Nicola Longo, Sandra K. Loo, Joseph Loscalzo, Richard L. Maas, Ellen F. Macnamara, Calum A. MacRae, Valerie V. Maduro, Marta M. Majcherska, May Christine V. Malicdan, Laura A. Mamounas, Teri A. Manolio, Rong Mao, Kenneth Maravilla, Thomas C. Markello, Ronit Marom, Gabor Marth, Beth A. Martin, Martin G. Martin, Julian A. Martínez-Agosto, Shruti Marwaha, Jacob McCauley, Allyn McConkie-Rosell, Colleen E. McCormack, Alexa T. McCray, Elisabeth McGee, Heather Mefford, J. Lawrence Merritt, Matthew Might, Ghayda Mirzaa, Eva Morava, Paolo M. Moretti, Marie Morimoto, John J. Mulvihill, David R. Murdock, Mariko Nakano-Okuno, Avi Nath, Stan F. Nelson, John H. Newman, Sarah K. Nicholas, Deborah Nickerson, Donna Novacic, Devin Oglesbee, James P. Orengo, Laura Pace, Stephen Pak, J. Carl Pallais, Christina GS. Palmer, Jeanette C. Papp, Neil H. Parker, John A. Phillips III, Jennifer E. Posey, Lorraine Potocki, Barbara N. Pusey, Aaron Quinlan, Wendy Raskind, Archana N. Raja, Deepak A. Rao, Genecee Renteria, Chloe M. Reuter, Lynette Rives, Amy K. Robertson, Lance H. Rodan, Jill A. Rosenfeld, Natalie Rosenwasser, Maura Ruzhnikov, Ralph Sacco, Jacinda B. Sampson, Susan L. Samson, Mario Saporta, C. Ron Scott, Judy Schaechter, Timothy Schedl, Kelly Schoch, Daryl A. Scott, Prashant Sharma, Vandana Shashi, Jimann Shin, Rebecca Signer, Catherine H. Sillari, Edwin K. Silverman, Janet S. Sinsheimer, Kathy Sisco, Edward C. Smith, Kevin S. Smith, Emily Solem, Lilianna Solnica-Krezel, Rebecca C. Spillmann, Joan M. Stoler, Nicholas Stong,

Jennifer A. Sullivan, Kathleen Sullivan, Angela Sun, Shirley Sutton, David A. Sweetser, Virginia Sybert, Holly K. Tabor, Cecelia P. Tamburro, Queenie K.-G. Tan, Mustafa Tekin, Fred Telischi, Willa Thorson, Cynthia J. Tifft, Camilo Toro, Alyssa A. Tran, Brianna M. Tucker, Tiina K. Urv, Adeline Vanderver, Matt Velinder, Dave Viskochil, Tiphonie P. Vogel, Colleen E. Wahl, Stephanie Wallace, Nicole M. Walley, Chris A. Walsh, Melissa Walker, Jennifer Wambach, Jijun Wan, Lee-kai Wang, Michael F. Wangler, Patricia A. Ward, Daniel Wegner, Mark Wener, Tara Wenger, Katherine Wesseling Perry, Monte Westerfield, Matthew T. Wheeler, Jordan Whitlock, Lynne A. Wolfe, Jeremy D. Woods, Shinya Yamamoto, John Yang, Guoyun Yu, Diane B. Zastrow, Chunli Zhao, Stephan Zuchner
